# Supplementary material for: Targeted Alpha-Particle Radiotherapy and Immune Checkpoint Inhibitors Induces Cooperative Inhibition on Tumor Growth of Malignant Melanoma
Source: MDPI journal article supplement (doi:10.3390/cancers13153676), 2021-07-22
Supplement: s1 [file s1]

# Targeted Alpha-particle Radiotherapy and Immune Checkpoint Inhibitors Induces Cooperative Inhibition on Tumor Growth of Malignant Melanoma

Mengshi Li, Dijie Liu, Dongyoul Lee, Yinwen Cheng, Nicholas J. Baumhover, Brenna M. Marks, Edwin A. Saggastume, Zuhair K. Ballas, Frances L. Johnson, Zachary S. Morris and Michael K. Schultz

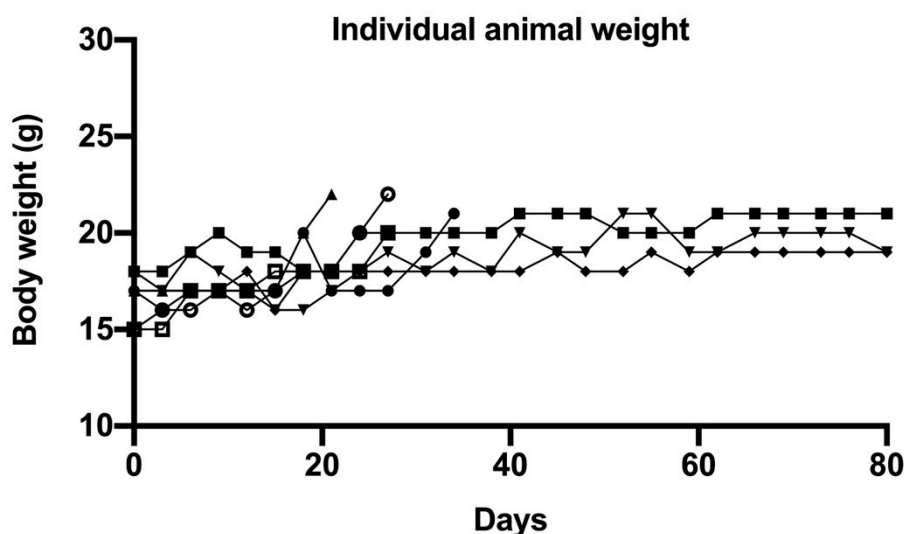

**Figure S1.** No acute toxicity was observed in C57BL6 mice that received combination of  $[^{212}\text{Pb}]\text{VMT01}$  and ICIs; Body weights of animals were monitored twice a week until endpoint was reached. No acute toxicity was observed. 3 animals survived until the conclusion of the study on day 80 without significant weight loss.
